# Supplementary material for: Inorganic–organic multiferroic hybrid films of Fe3O4 and PVDF with significant magneto-dielectric coupling
Source: Royal Society of Chemistry journal article supplement (doi:10.1039/c3tc30216d), 2013-01-01
Supplement: c3tc30216d.pdf [file c3tc30216d.pdf]

Electronic Supplementary Information

# Inorganic-Organic multiferroic hybrid films of $\text{Fe}_3\text{O}_4$ and PVDF with excellent magneto-electric coupling

O. D. Jayakumar<sup>a</sup>, B. P Mandal<sup>a</sup>, J. Majeed<sup>a</sup>, G. Lawes<sup>b</sup>, R. Naik<sup>b</sup>, A. K. Tyagi<sup>a\*</sup>

<sup>a</sup> Chemistry Division, Bhabha Atomic Research Centre, Mumbai, India – 400085

<sup>b</sup> Department of Physics and Astronomy, Wayne State University, Detroit, MI-48202, USA

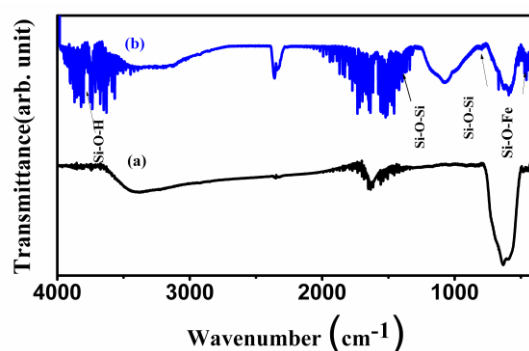

Figure S1: IR spectra of (a)  $\text{Fe}_3\text{O}_4$  and (b) silica coated  $\text{Fe}_3\text{O}_4$

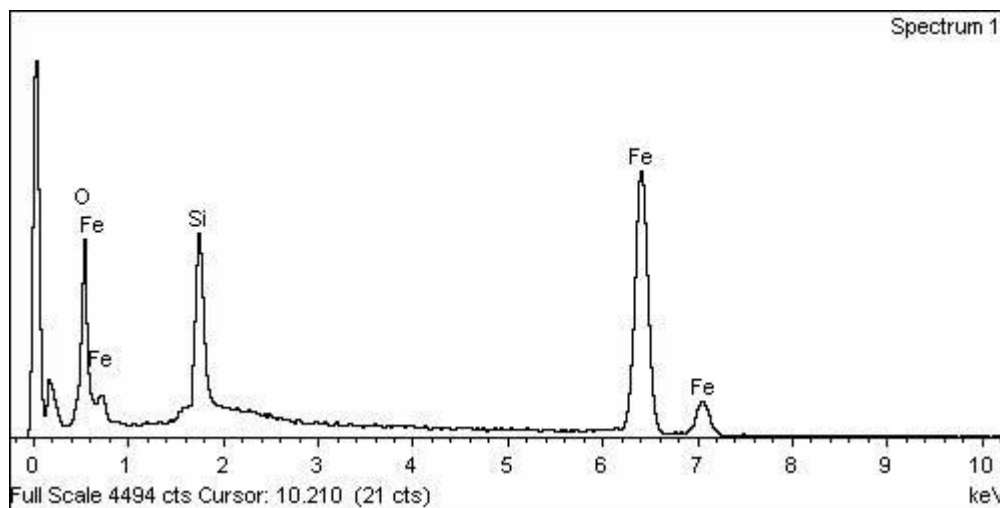

Figure S2: EDS spectra of silica coated  $\text{Fe}_3\text{O}_4$

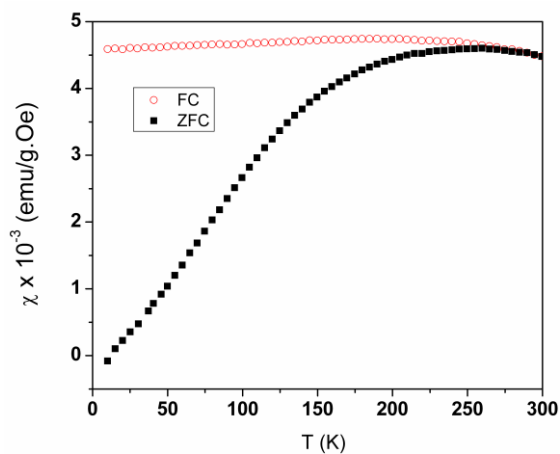

Figure S3: FC-ZFC behavior of PVDF-A

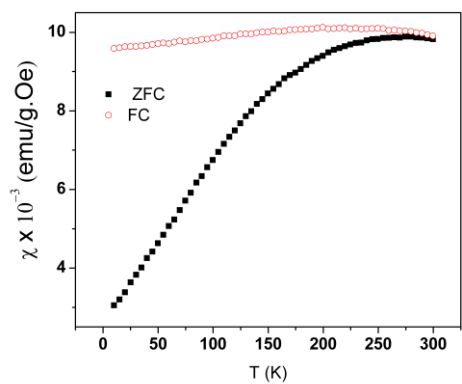

Figure S4: FC-ZFC behavior of PVDF-B

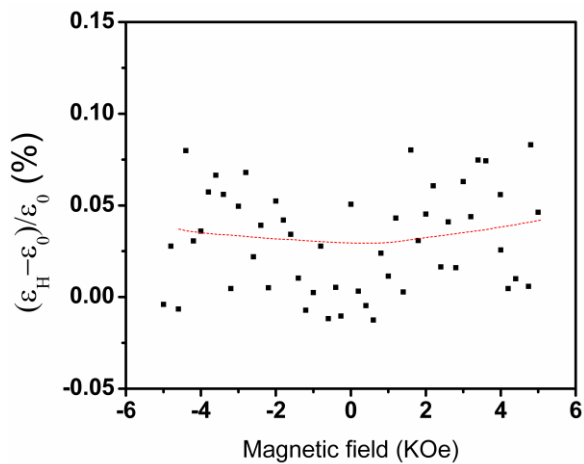

Figure S5: Magnetodielectric coupling of the Fe<sub>3</sub>O<sub>4</sub>-SiO<sub>2</sub> composite
